# Supplementary material for: Aspirin at 75 to 81 mg Daily for the Prevention of Preterm Pre-Eclampsia: Systematic Review and Meta-Analysis
Source: MDPI journal article supplement (doi:10.3390/jcm13041022), 2024-02-10
Supplement: s1 [file s1]

## Supplementary Materials:

**Figure S1.** Impact of aspirin 75-81mg vs placebo or no treatment on birth weight by risk of bias.

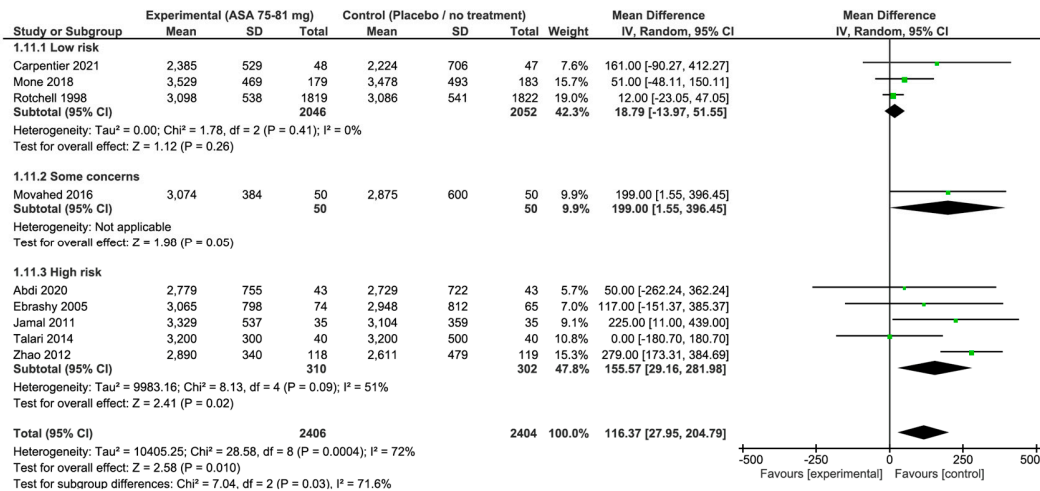

We observed that the dose of aspirin (ASA) at 75–81 mg daily was associated with a significant greater birth weight, when compared to placebo or no treatment. When these results were stratified by risk of bias, there were no significant differences for the low-risk studies and a significant difference with a greater birth weight for the moderate and high-risk studies, when compared aspirin (ASA) at 75–81 mg daily to placebo or no treatment.
